# Supplementary material
Source: PubMed Central journal article supplement (PMC10443203)

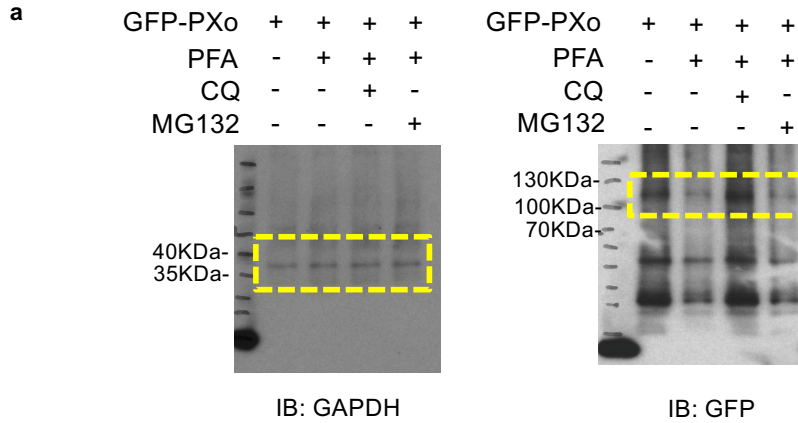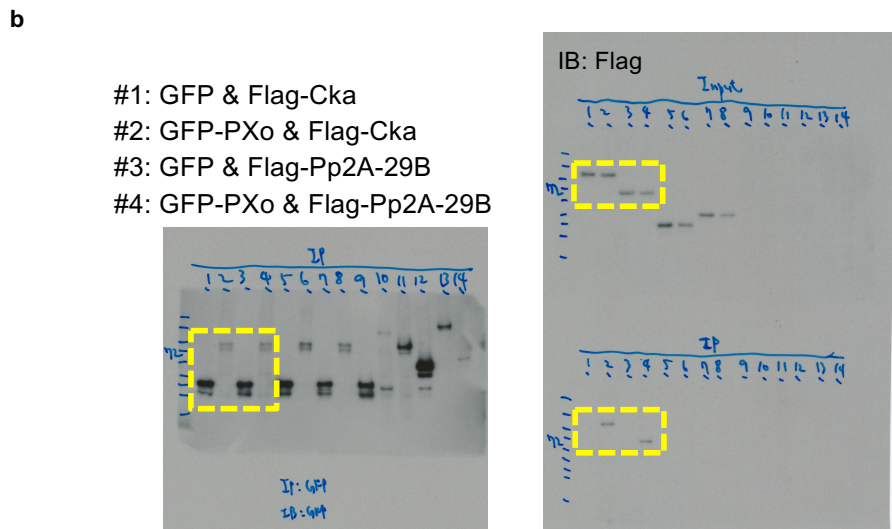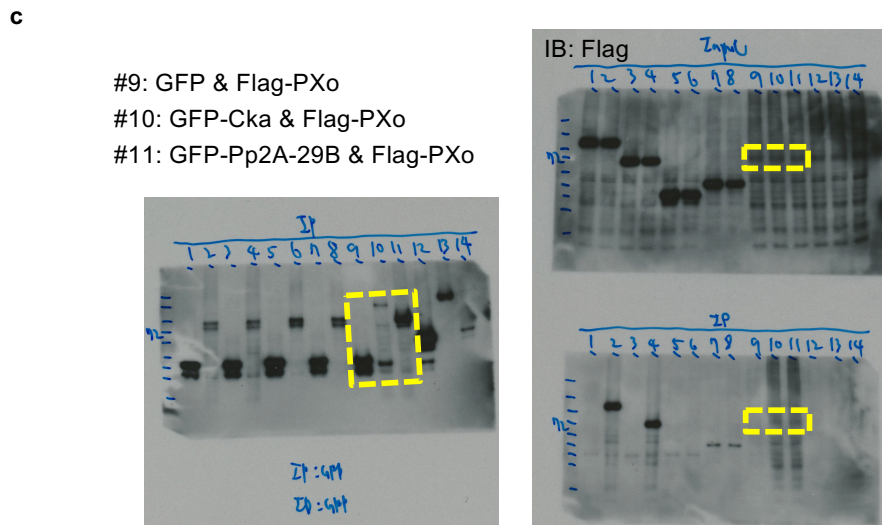

**d**

#1: Myo1Ats ; tub-Flag-Cka > Luc-i no.1      #3: Myo1Ats ; tub-Flag-Cka > Luc-i no.2  
#2: Myo1Ats ; tub-Flag-Cka > PXo-i no.1      #4: Myo1Ats ; tub-Flag-Cka > PXo-i no.2

IB: Flag

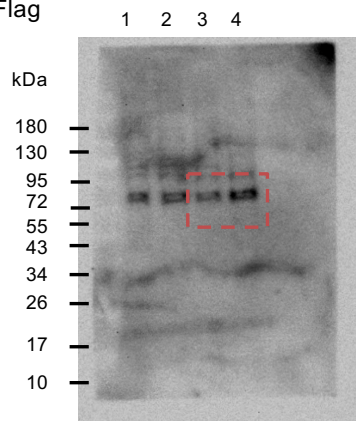

IB: Tubulin

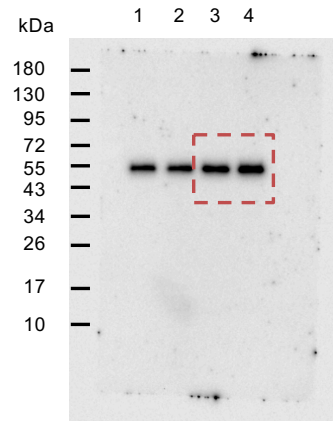

**e**

#1: Act-GFP S2R+ lysate      #3: tub-GFP midgut lysate pulldown with nanobody  
#2: Act-GFP-PXo S2R+ lysate      #4: tub-GFP-PXo midgut lysate pulldown with nanobody

anti-PXo antibody IB

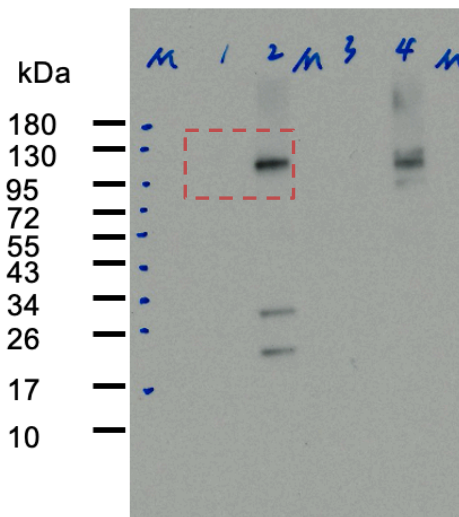

IB: Tubulin

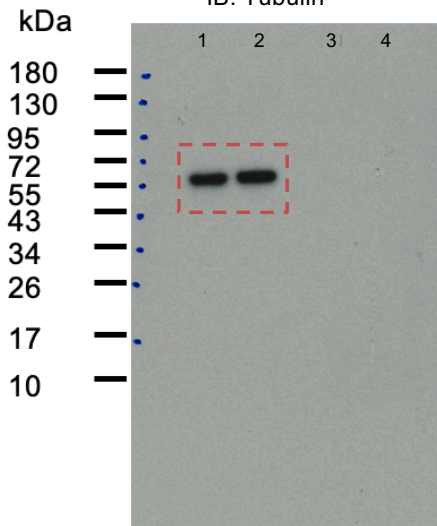

**f**

#1: GFP-PXo $\Delta$ SPX Normal  
#2: GFP-PXo $\Delta$ SPX PFA

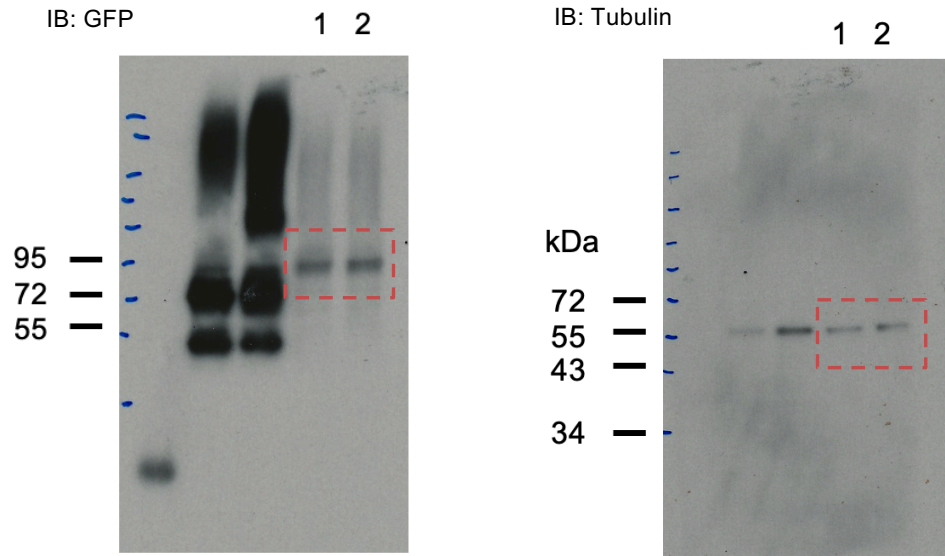

**g**

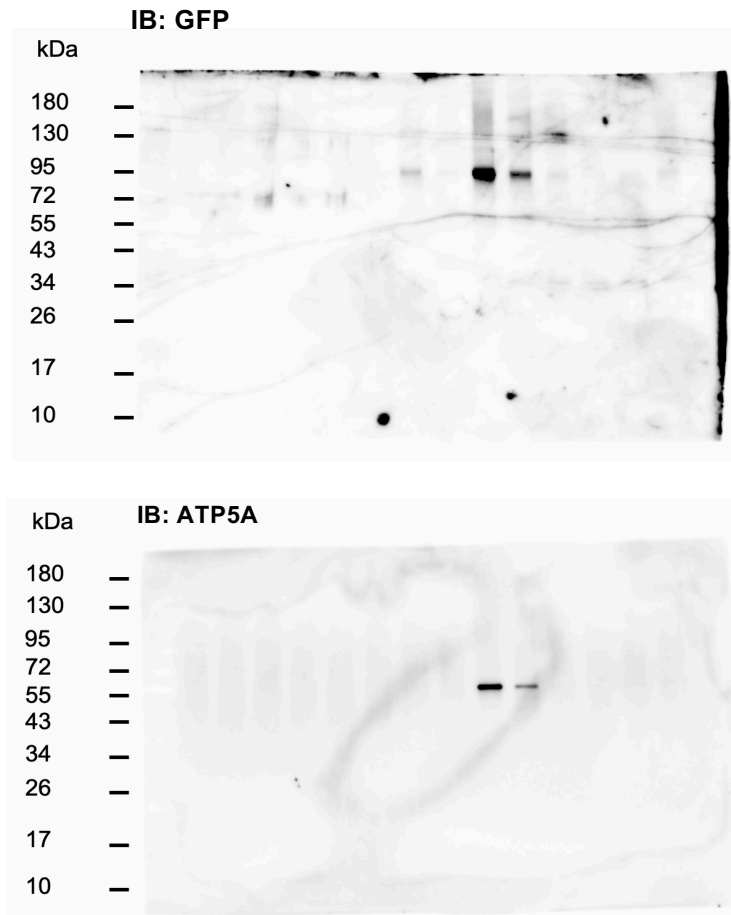

Supplement: NIHMS1922834-supplement-Supplementary_Figure_1.pdf [file NIHMS1922834-supplement-Supplementary_Figure_1.pdf]
